# Supplementary material for: Identification of cleavage sites and substrate proteins for two mitochondrial intermediate peptidases in Arabidopsis thaliana
Source: PubMed Central journal article supplement (PMC4986872; doi:10.1093/jxb/erv064), 2015-03-01
Supplement: supp_erv064_jexbot142661_file001.pdf [file supp_erv064_jexbot142661_file001.pdf]

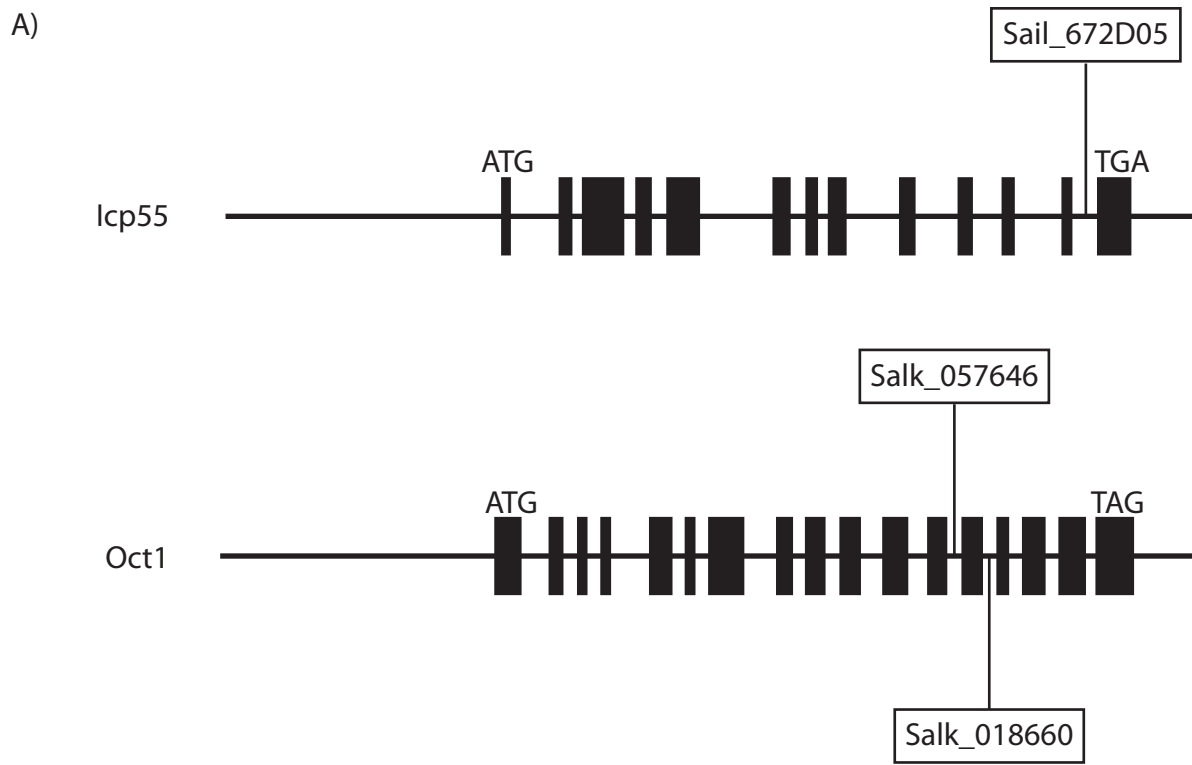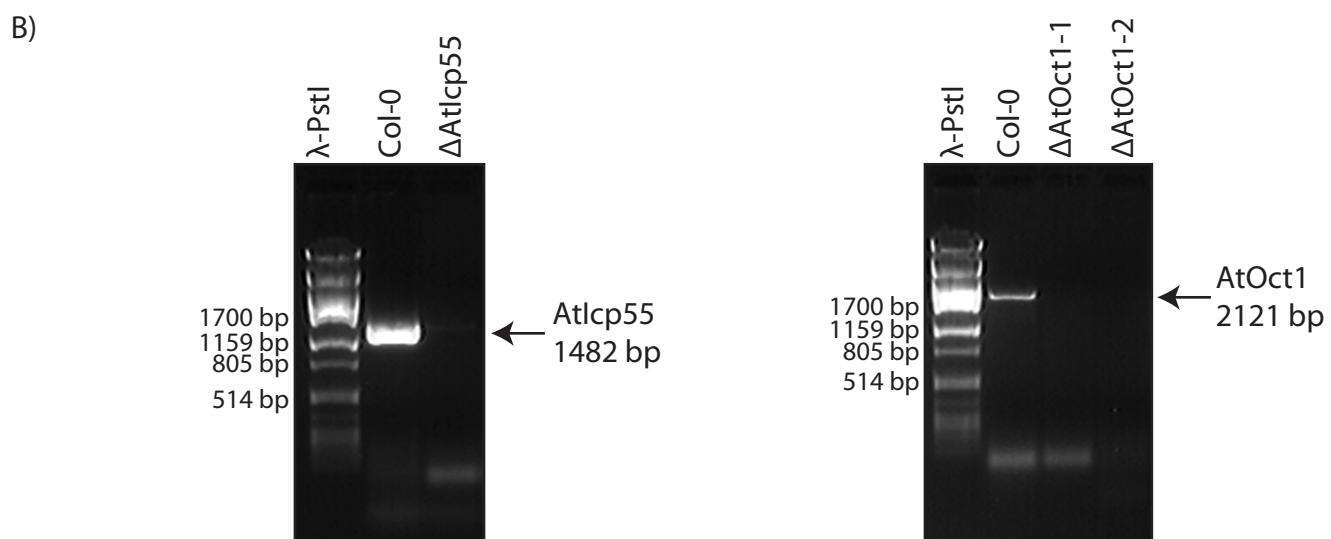

Supplementary Figure 1
